# Supplementary material for: Giant Enhancement of Radiative Recombination in Perovskite Light-Emitting Diodes with Plasmonic Core-Shell Nanoparticles
Source: PubMed Central journal article supplement (PMC7823440; doi:10.3390/nano11010045), 2020-12-27
Supplement: nanomaterials-11-00045-s001.pdf [file nanomaterials-11-00045-s001.pdf]

# Supplementary Materials: Giant Enhancement of Radiative Recombination in Perovskite Light-emitting Diodes with Plasmonic Core-shell Nanoparticles

Mikhail A. Masharin <sup>1,‡</sup>, Alexander S. Berestennikov <sup>1,3‡</sup> , Daniele Baretin <sup>2</sup> , Pavel M. Voroshilov <sup>1\*</sup> , Konstantin S. Ladutenko <sup>1</sup>, Aldo Di Carlo <sup>3</sup> , and Sergey V. Makarov <sup>1</sup> 

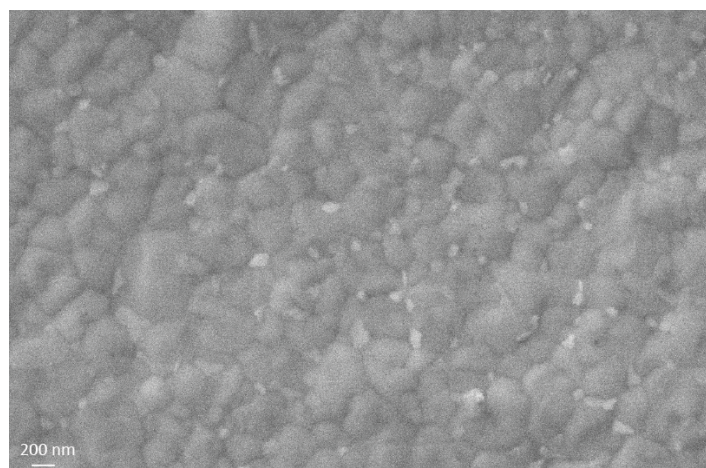

Figure S1. SEM image FAPbBr<sub>2</sub>I film.

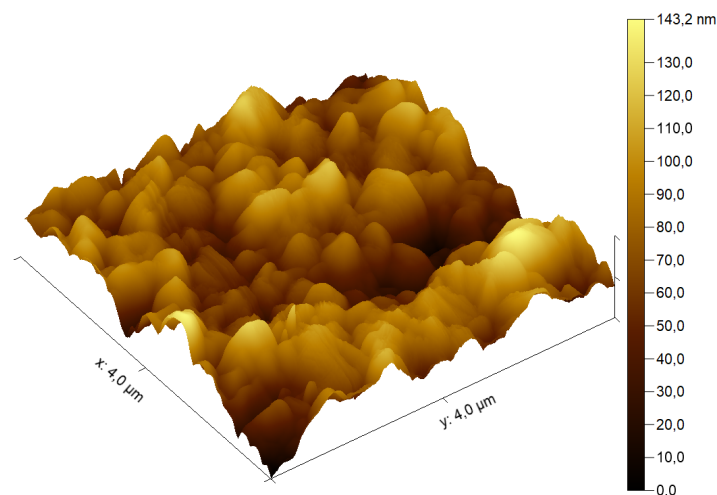

Figure S2. AFM image of FAPbBr<sub>2</sub>I film.

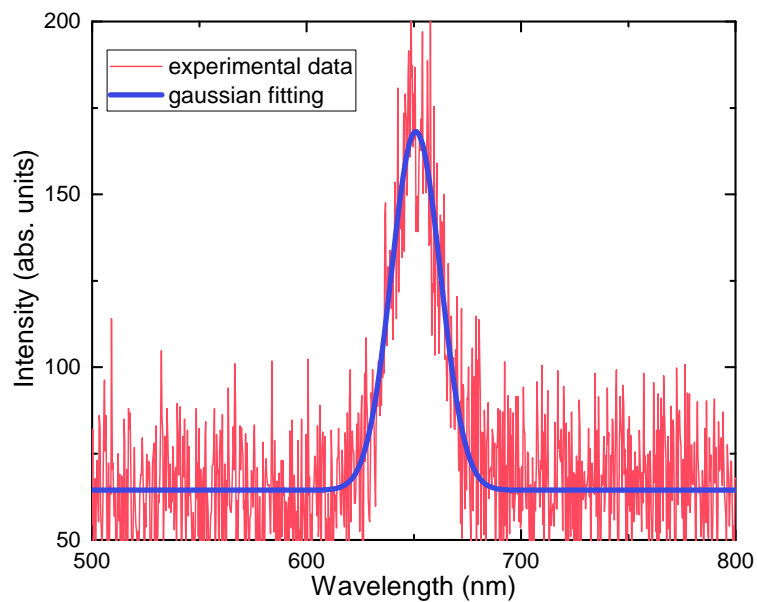

Figure S3. Measured electroluminescence spectra of FAPbBr<sub>2</sub>I device at 2V.

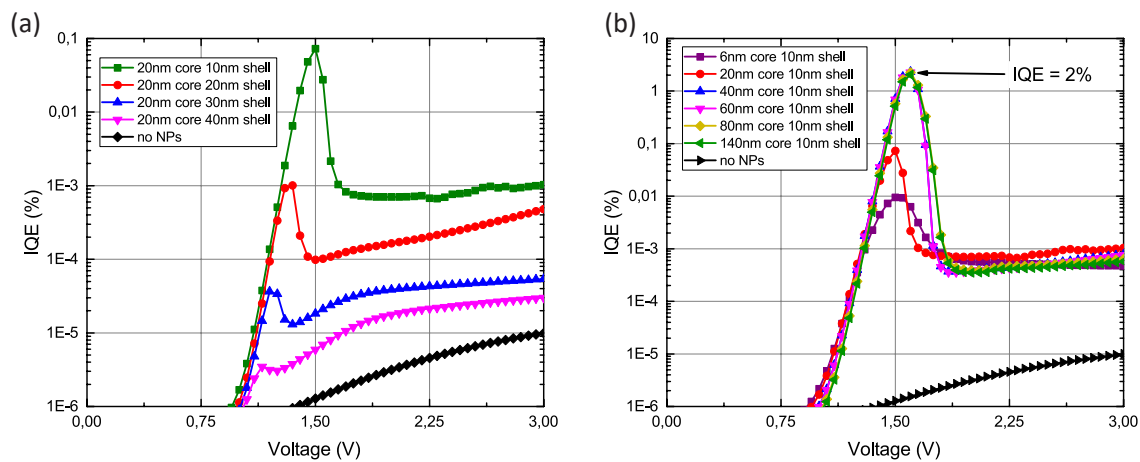

Figure S4. Calculated IQE characteristics for optimized architectures.

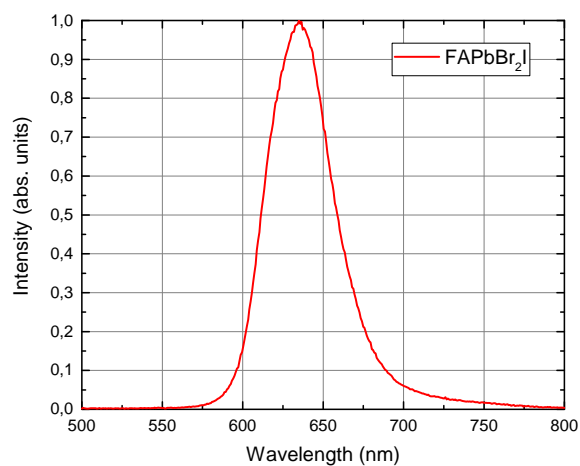

**Figure S5.** Measured photoluminescence spectra of FAPbBr<sub>2</sub>I film.

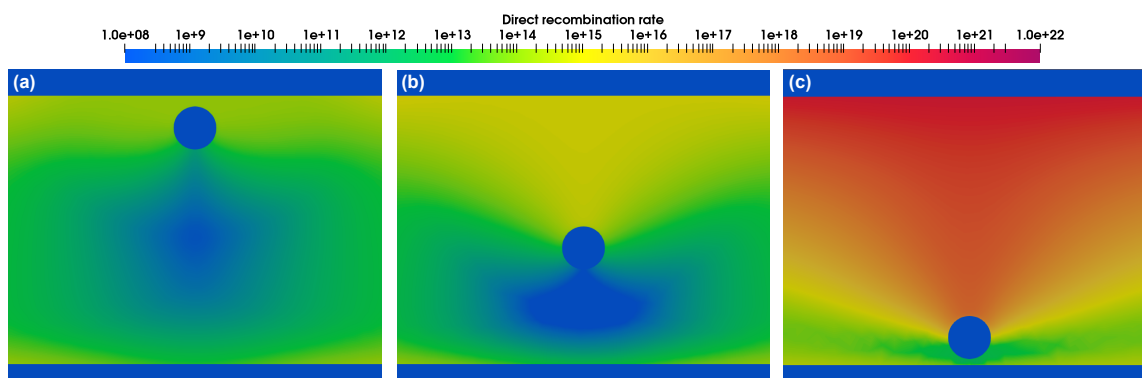

**Figure S6.** Radiative recombination rate for different core-shell nanoparticle location at 1.5V.

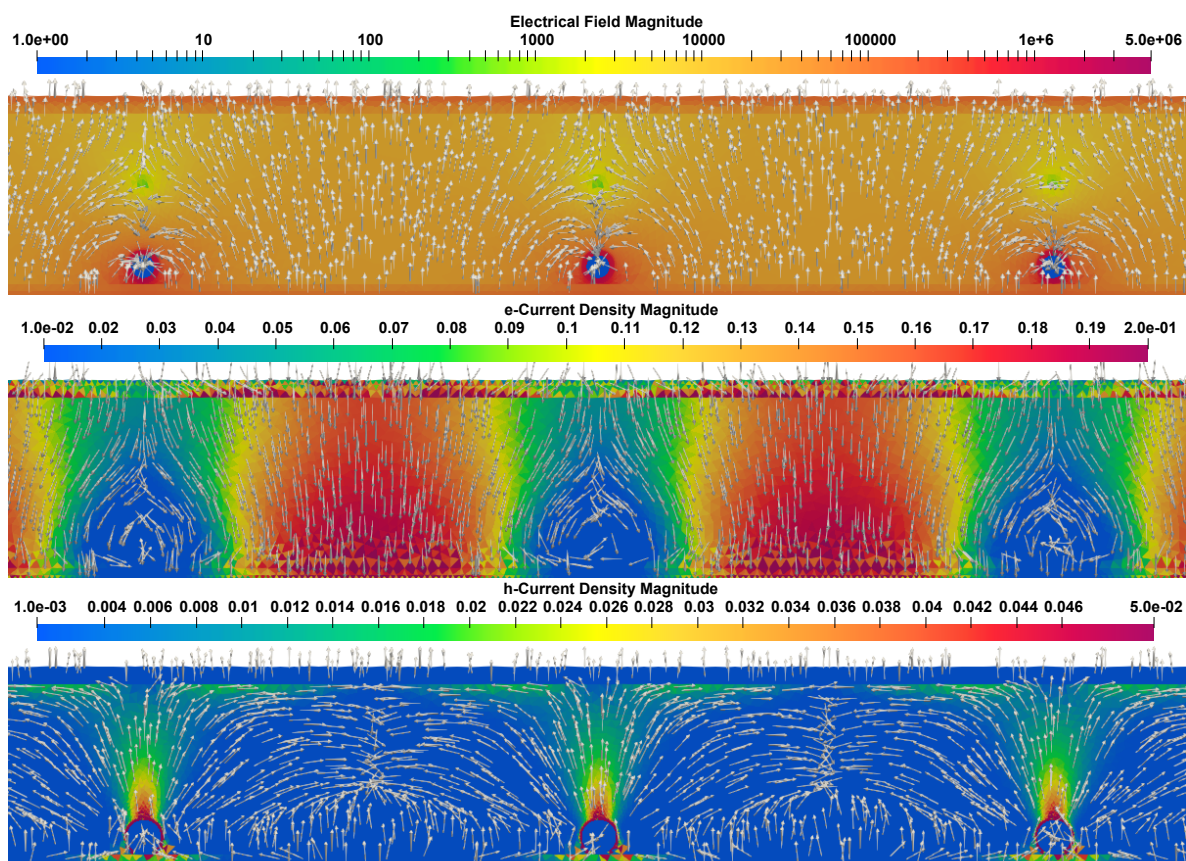

Figure S7. Electric field, electron and hole current density distributions for three nanoparticles.

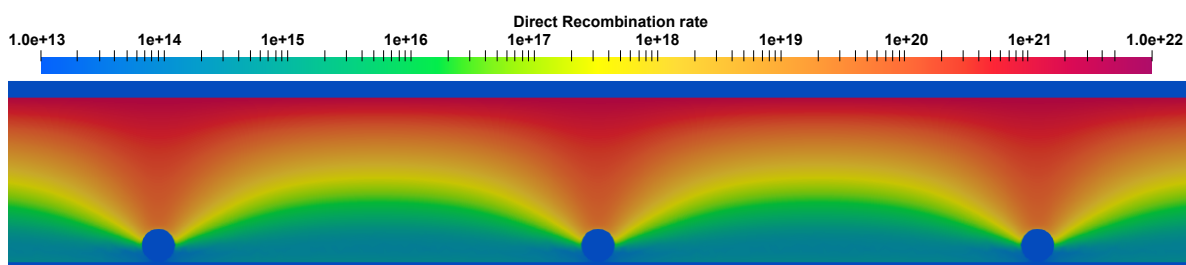

Figure S8. Radiative recombination rate for three nanoparticles.
